# Supplementary material
Source: PubMed Central journal article supplement (PMC7661082)
Supplement: 20-00667.pdf [file 20-00667.pdf]

## ON-LINE APPENDIX

### Panel Members (in Alphabetical Order)

Felipe Albuquerque, MD  
Department of Neurosurgery  
Barrow Neurological Institute  
Phoenix, Arizona

Adam Arthur, MD  
Department of Neurosurgery  
Semmes-Murphey Clinic/University of Tennessee  
Memphis, Tennessee

Patrick Brouwer, MD  
Department of Interventional Neuroradiology  
Karolinska Hospital  
Stockholm, Sweden  
University NeuroVascular Center  
Leiden University Medical Center  
Haaglanden Medical Center  
Leiden, the Netherlands

Franziska Dorn, MD  
Department of Neuroradiology  
University Hospital Bonn, Bonn, Germany

Jens Fiehler, MD  
Department of Diagnostic and Interventional Neuroradiology  
University Medical Center Hamburg-Eppendorf  
Hamburg, Germany

Justin Fraser, MD  
Departments of Neurosurgery, Neurology, Radiology, and Neuroscience  
University of Kentucky  
Lexington, Kentucky

Mahesh Jayaraman, MD  
Departments of Diagnostic Imaging, Neurology, and Neurosurgery  
Warren Alpert School of Medicine at Brown University  
Rhode Island Hospital  
Providence, Rhode Island

Mary E. Jensen, MD  
Departments of Neurologic Surgery, Radiology, and Medical Imaging  
University of Virginia Health  
Charlottesville, Virginia

David Kallmes, MD  
Department of Radiology  
Mayo Clinic  
Rochester, Minnesota

Jianmin Liu, MD  
Department of Neurosurgery  
Changhai Hospital Naval Medical University  
Shanghai, China

Charles Majoie, MD  
Department of Radiology  
Academic Medical Center  
Amsterdam, the Netherlands

Raul Nogueira, MD  
Department of Neurology  
Emory University School of Medicine

Atlanta, Georgia

Kirill Orlov, MD  
Meshalkin Novosibirsk Research Institute of Circulation Pathology  
Novosibirsk, Russian Federation

Nobuyuki Sakai, MD  
Department of Neurosurgery  
Kobe City Medical Center General Hospital  
Hyogo, Japan

Allan Taylor, MD  
Groote Schuur Hospital  
University of Cape Town  
Cape Town, South Africa

### Additional Experts

René Chapot, MD  
Department of Neuroradiology  
Alfred Krupp Krankenhaus Essen  
Essen, Germany

Lucie Thibault, PharmD  
Member of the Scientific Committee World Federation of Interventional and Therapeutic Neuroradiology

### Consensus Definition

Consensus was predefined as an agreement of 70% for a particular answer option in case of dichotomous questions and 50% for questions with  $\geq 2$  answer options. If consensus for a particular question was not achieved, this question was included in the next survey round. Each question was asked a maximum of 2 times.

**Literature Search.** Our MEDLINE literature search showed that the number of publications focusing on stent-assisted coiling/flow diversion for ruptured intracranial aneurysms increased substantially from 2006 to 2019 (On-line Fig 1). However, literature on antiplatelet management for these cases was mostly limited to small retrospective studies.<sup>1-7</sup>

## REFERENCES

1. Li C, Li Y. **Stent-assisted coiling of ruptured wide-necked intracranial aneurysms.** *Interv Neuroradiol* 2013;19:283–88 CrossRef Medline
2. Yang P, Zhao K, Zhou Y, et al. **Stent-assisted coil placement for the treatment of 211 acutely ruptured wide-necked intracranial aneurysms: a single-center 11-year experience.** *Radiology* 2015;276:545–52 CrossRef Medline
3. Liu P, Lv X, Li Y, et al. **Stent-assisted coiling of ruptured wide-necked intracranial aneurysms: A single-center experience of 218 consecutive patients.** *Neurol India* 2016;64(Suppl):S70–77 CrossRef Medline
4. Madaelil TP, Moran CJ, Cross DT, et al. **Flow diversion in ruptured intracranial aneurysms: a meta-analysis.** *AJNR Am J Neuroradiol* 2017;38:590–95 CrossRef Medline
5. Bhogal P, Henkes E, Schob S, et al. **The use of flow diverters to treat small ( $\leq 5$  mm) ruptured, saccular aneurysms.** *Surg Neurol Int* 2018;9:216 CrossRef Medline
6. Zuo Q, Yang P, Lv N, et al. **Safety of coiling with stent placement for the treatment of ruptured wide-necked intracranial aneurysms: a contemporary cohort study in a high-volume center after**

- improvement of skills and strategy. *J Neurosurg* 2019;131:435–41 CrossRef Medline
7. Howard BM, Frerich JM, Madaelil TP, et al. **“Plug and pipe” strategy for treatment of ruptured intracranial aneurysms.** *J Neurointerv Surg* 2019;11:43–48 CrossRef Medline
  8. Kim KS, Fraser JF, Grupke S, et al. **Management of antiplatelet therapy in patients undergoing neuroendovascular procedures.** *J Neurosurg* 2018;129:890–905 CrossRef Medline
  9. Pandya DJ, Fitzsimmons BF, Wolfe TJ, et al. **Measurement of antiplatelet inhibition during neurointerventional procedures: the effect of antithrombotic duration and loading dose.** *J Neuroimaging* 2010;20:64–69 CrossRef Medline
  10. Choi HH, Cho YD, Han MH, et al. **Antiplatelet premedication-free stent-assisted coil embolization in acutely ruptured aneurysms.** *World Neurosurg* 2018;114:e1152–60 CrossRef Medline
  11. Dumont TM, Kan P, Snyder KV, et al. **Adjunctive use of eptifibatid for complication management during elective neuroendovascular procedures.** *J Neurointerv Surg* 2013;5:226–30 CrossRef Medline
  12. Samaniego EA, Gibson E, Nakagawa D, et al. **Safety of tirofiban and dual antiplatelet therapy in treating intracranial aneurysms.** *Stroke Vasc Neurol* 2019;4:36–42 CrossRef Medline
  13. Kang HS, Kwon BJ, Roh HG, et al. **Intra-arterial tirofiban infusion for thromboembolism during endovascular treatment of intracranial aneurysms.** *Neurosurgery* 2008;63:230–37; discussion 237–38 CrossRef Medline
  14. Kim S, Choi JH, Kang M, et al. **Safety and efficacy of intravenous tirofiban as antiplatelet premedication for stent-assisted coiling in acutely ruptured intracranial aneurysms.** *AJNR Am J Neuroradiol* 2016;37:508–14 CrossRef Medline
  15. Brinjikji W, Morales-Valero SF, Murad MH, et al. **Rescue treatment of thromboembolic complications during endovascular treatment of cerebral aneurysms: a meta-analysis.** *AJNR Am J Neuroradiol* 2015;36:121–25 CrossRef Medline

**On-line Table: Key publications that were identified during the literature search and used as a basis for panel consensus on antiplatelet agents and dosage**

| Author, Year                        | Publication Type           | Number of Patients | Focus                                                                                                                                               |
|-------------------------------------|----------------------------|--------------------|-----------------------------------------------------------------------------------------------------------------------------------------------------|
| Kim et al, 2018 <sup>8</sup>        | Review                     | —                  | Pharmacokinetics and drug-drug interactions of common antiplatelet agents                                                                           |
| Pandya et al, 2010 <sup>9</sup>     | Retrospective cohort study | 216                | Effect of antiplatelet regimen on platelet function testing results                                                                                 |
| Choi et al, 2018 <sup>10</sup>      | Retrospective cohort study | 449                | Safety of antiplatelet-premedication-free stent-assisted coiling in acutely ruptured intracranial aneurysms                                         |
| Dumont et al, 2013 <sup>11</sup>    | Case series                | 12                 | Safety and efficacy of eptifibatid in case of thromboembolic complications during elective neurovascular procedures                                 |
| Samaniego et al, 2019 <sup>12</sup> | Retrospective cohort study | 141                | Safety and efficacy of tirofiban and dual antiplatelet therapy for acute and elective endovascular treatment of intracranial aneurysms              |
| Kang et al, 2008 <sup>13</sup>      | Retrospective cohort study | 24                 | Safety and efficacy of tirofiban in case of thromboembolic complications during acute and elective endovascular treatment of intracranial aneurysms |
| Kim et al, 2016 <sup>14</sup>       | Retrospective cohort study | 40                 | Safety and efficacy of intravenous tirofiban for stent-assisted coiling in ruptured intracranial aneurysms                                          |
| Brinjikji et al, 2015 <sup>15</sup> | Meta-analysis              | 516                | Rescue treatment strategies for thromboembolic complications during acute and elective endovascular treatment of cerebral aneurysms                 |

**Note:**— indicates not applicable (review paper).

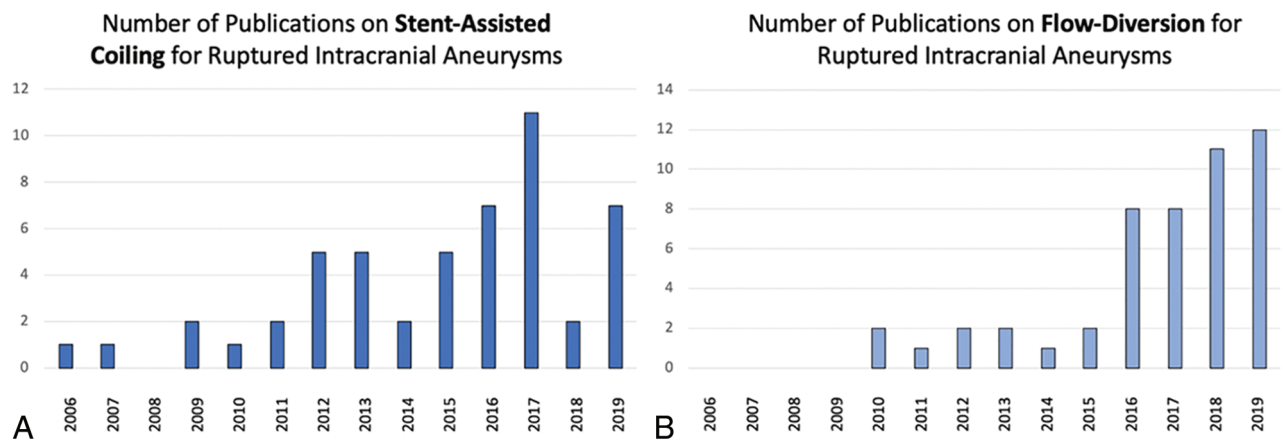

**ON-LINE FIG 1.** Number of publications on stent-assisted coiling (A) and flow diversion (B) for ruptured intracranial aneurysms for 2006–2019 (MEDLINE search).

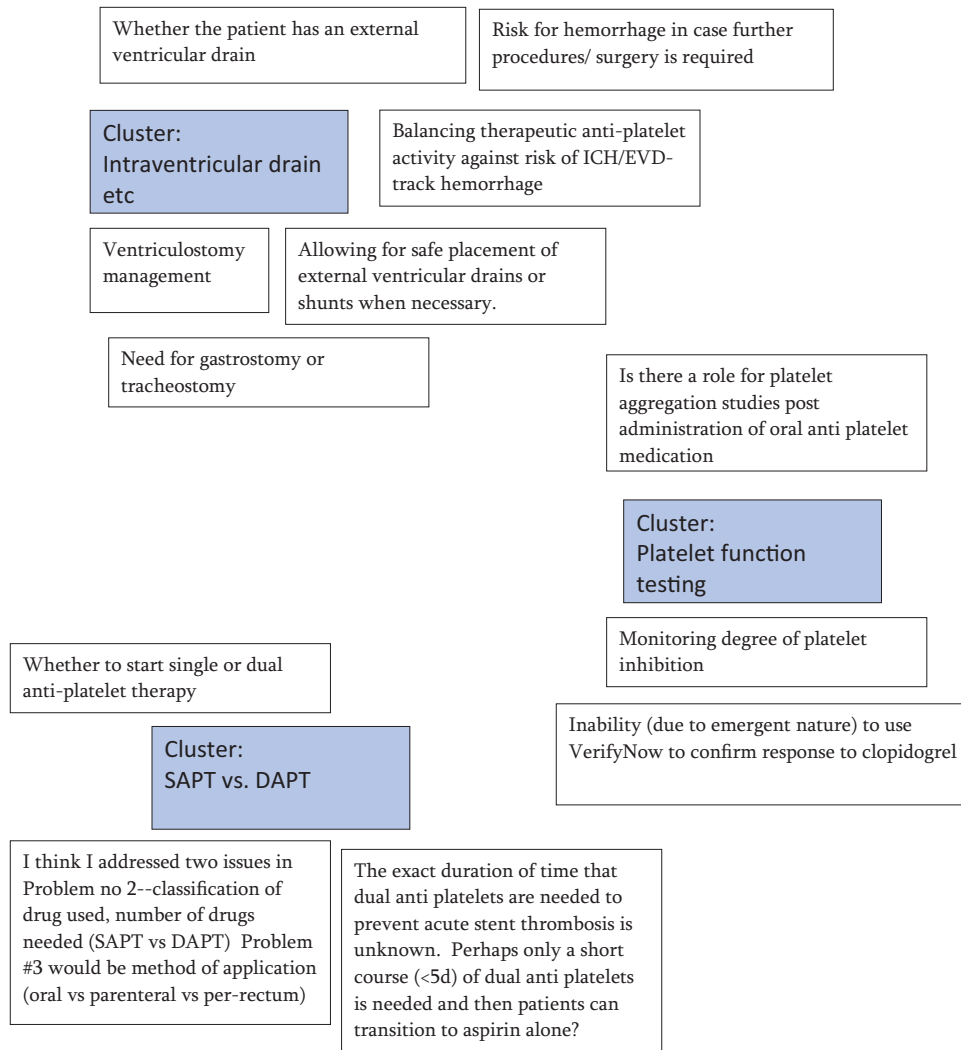

**ON-LINE FIG 2.** Affinity diagram (round 1). EVD indicates external ventricular drain; ICH, intracerebral hemorrhage; SAPT, single antiplatelet therapy; DAPT, dual antiplatelet therapy; FD, flow diverter; PO, per os; NG, nasogastric; IM, intramuscular; ASA, acetylsalicylic acid; 5d, 5 days; AP, antiplatelet; per peg, percutaneous endoscopic gastrostomy; SQ, subcutaneous.

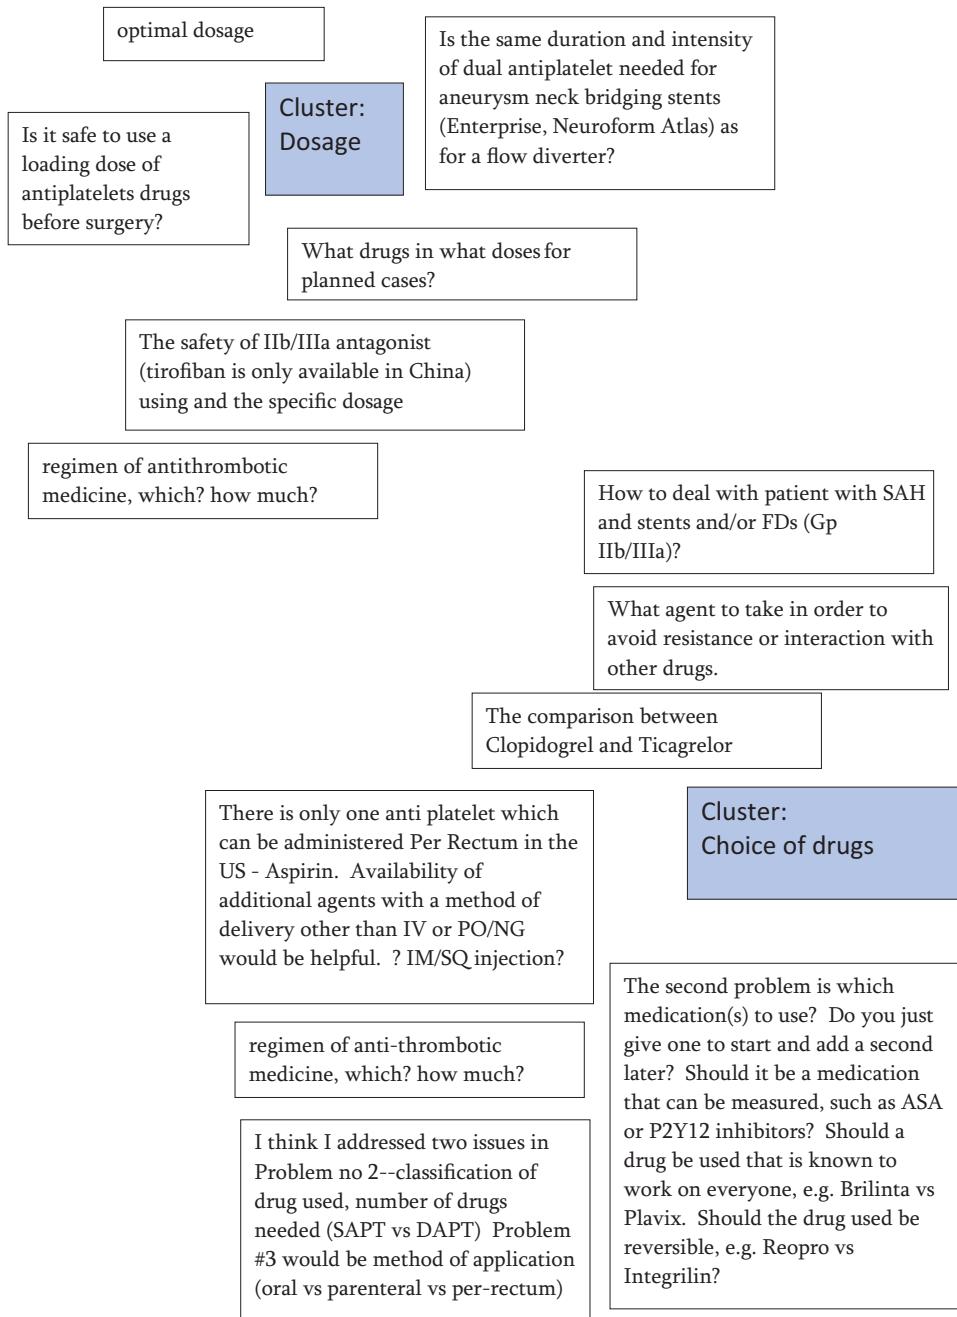

ON-LINE FIG 2. Continued.

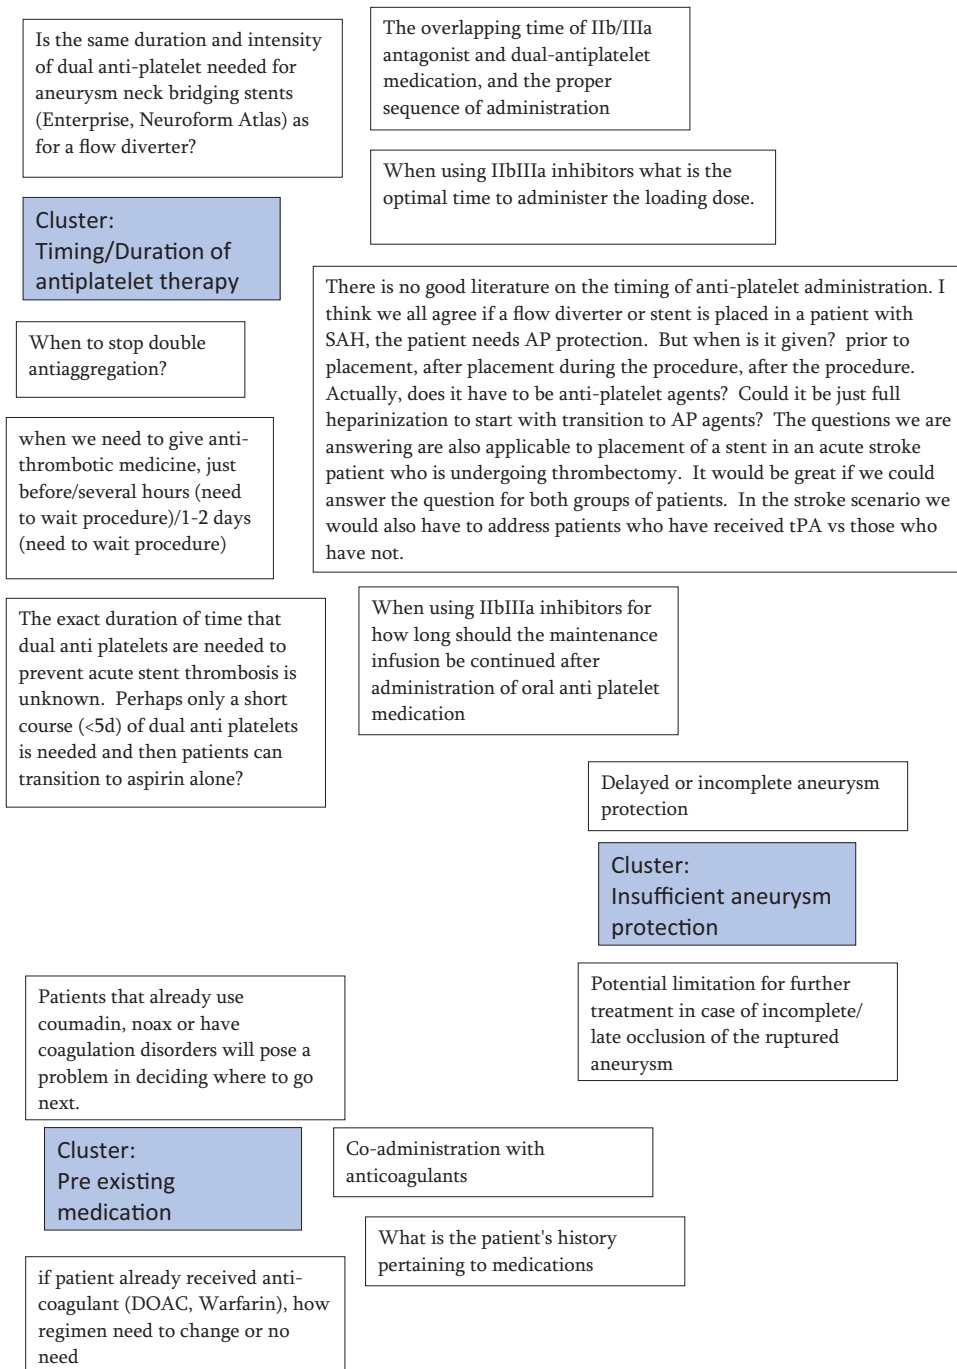

ON-LINE FIG 2. Continued.

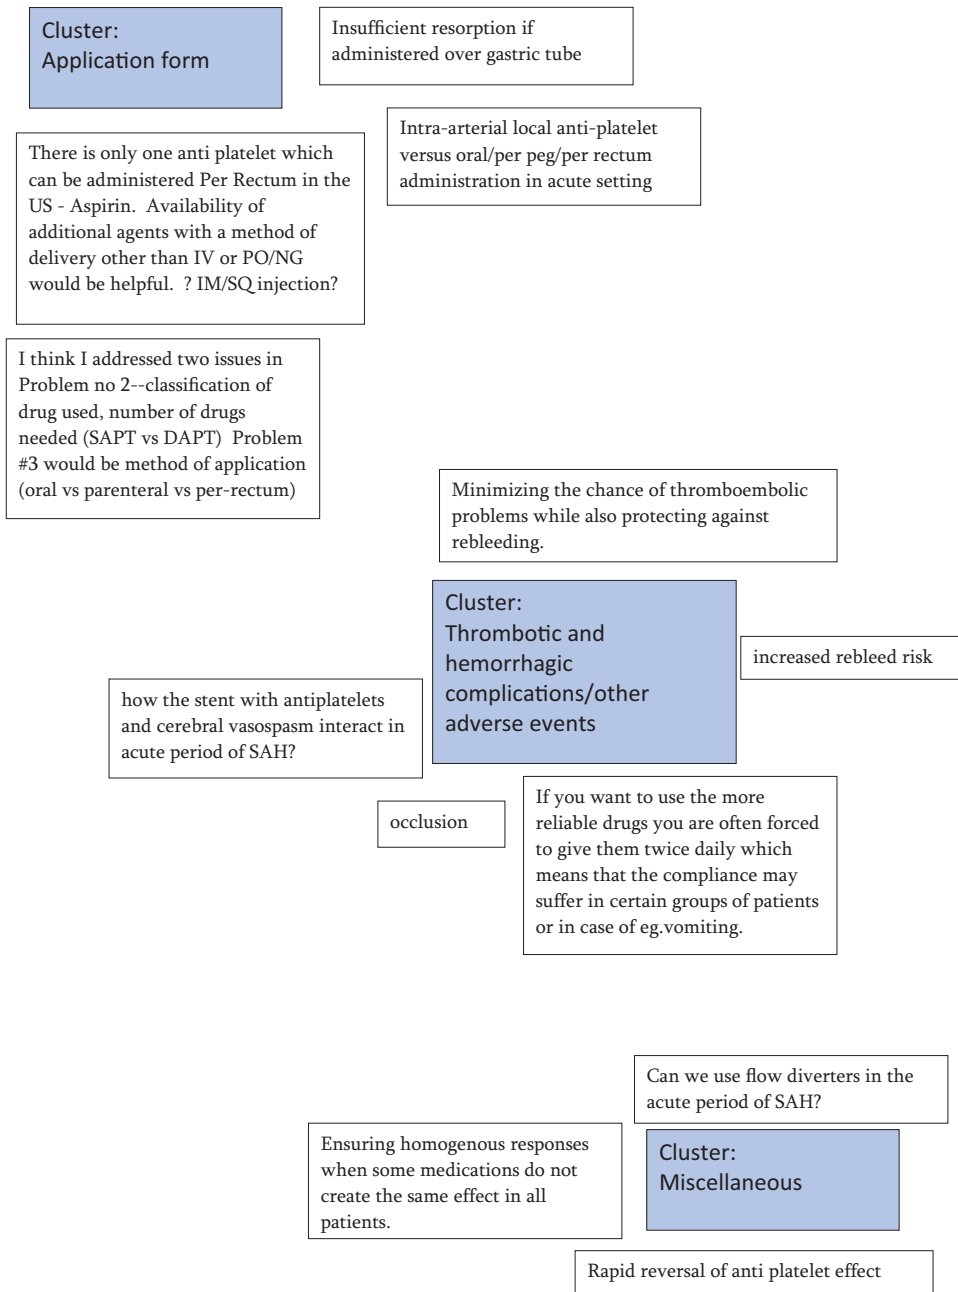

ON-LINE FIG 2. Continued.
